# Supplementary material for: Limited dCTP Availability Accounts for Mitochondrial DNA Depletion in Mitochondrial Neurogastrointestinal Encephalomyopathy (MNGIE)
Source: PubMed Central journal article supplement (PMC3069123; doi:10.1371/journal.pgen.1002035), 2011-03-31
Supplement: pgen.1002035.s001.pdf [file pgen.1002035.s001.pdf]

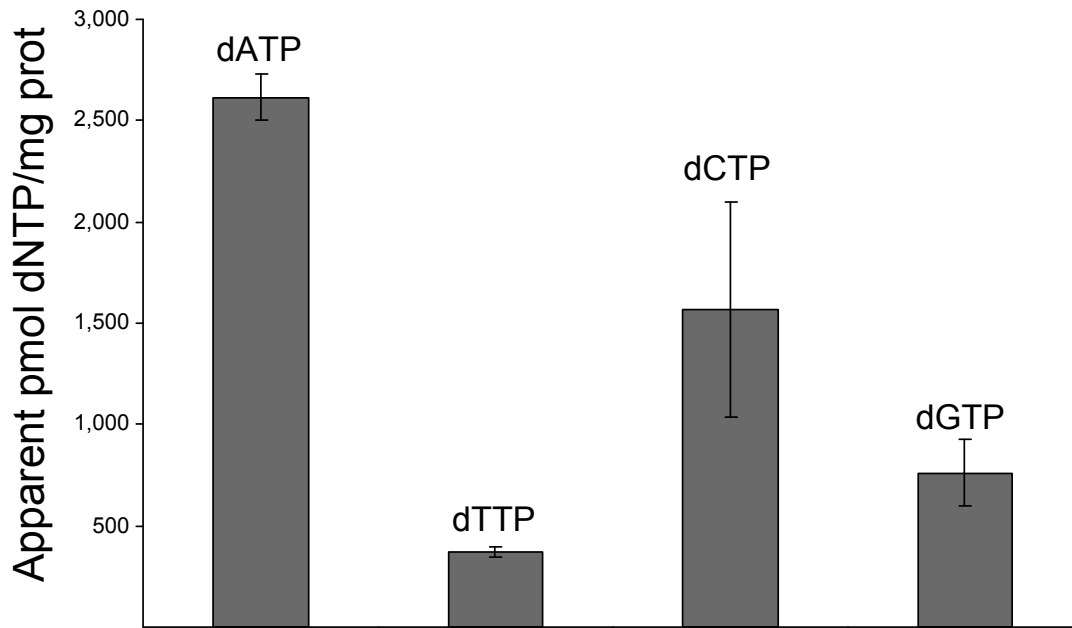

|      |      |      |      |      |
|------|------|------|------|------|
| dATP | 100* | 1    | 1    | 1    |
| dTTP | 1    | 100* | 1    | 1    |
| dCTP | 1    | 1    | 100* | 1    |
| dGTP | 1    | 1    | 1    | 100* |
| (n)  | 3    | 3    | 3    | 3    |
