# Supplementary material for: Limited dCTP Availability Accounts for Mitochondrial DNA Depletion in Mitochondrial Neurogastrointestinal Encephalomyopathy (MNGIE)
Source: PubMed Central journal article supplement (PMC3069123; doi:10.1371/journal.pgen.1002035), 2011-03-31
Supplement: pgen.1002035.s002.pdf [file pgen.1002035.s002.pdf]

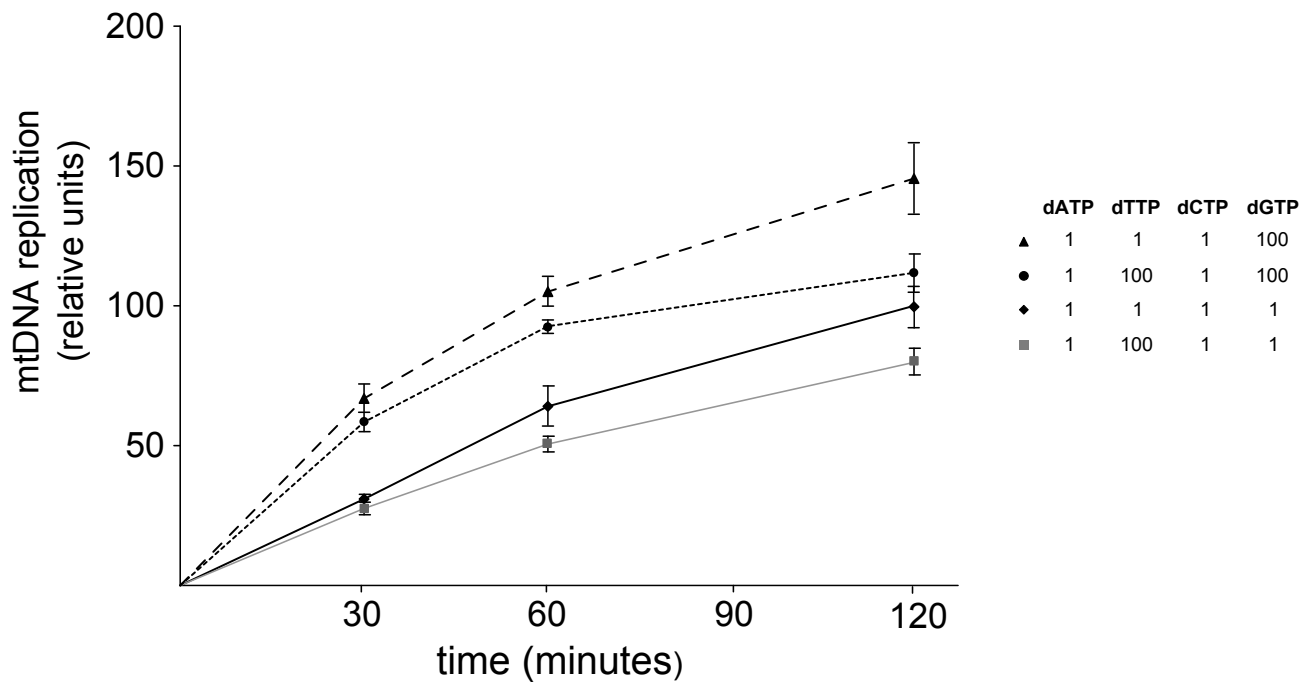

| Replication rate (relative units) |                 |
|-----------------------------------|-----------------|
| 0-30 min                          | 60-120 min      |
| ▲ $2.23 \pm 0.17$                 | $0.67 \pm 0.15$ |
| ● $1.94 \pm 0.10$                 | $0.32 \pm 0.11$ |
| ◆ $1.03 \pm 0.06$                 | $0.60 \pm 0.12$ |
| ■ $0.92 \pm 0.08$                 | $0.49 \pm 0.04$ |
