# Supplementary material for: Limited dCTP Availability Accounts for Mitochondrial DNA Depletion in Mitochondrial Neurogastrointestinal Encephalomyopathy (MNGIE)
Source: PubMed Central journal article supplement (PMC3069123; doi:10.1371/journal.pgen.1002035), 2011-03-31

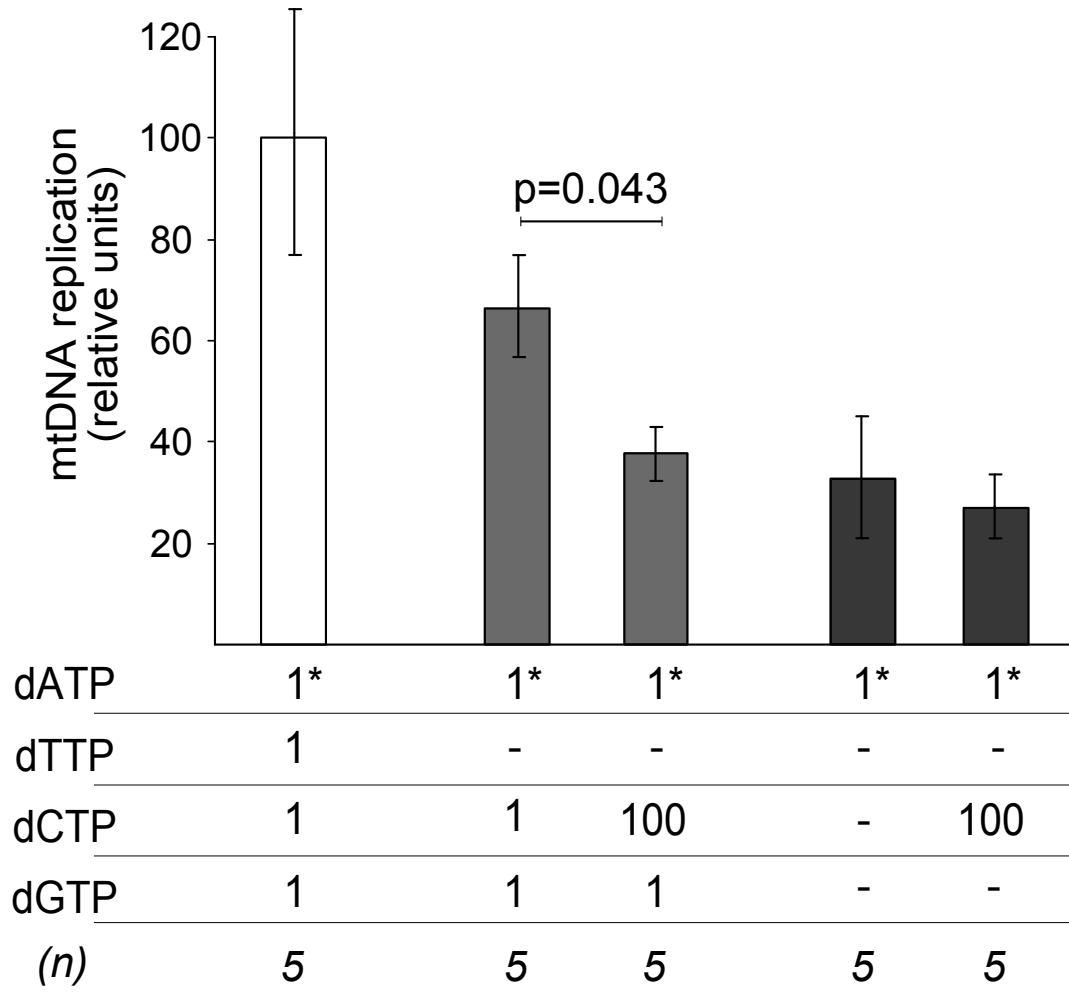

Supplement: pgen.1002035.s004.pdf [file pgen.1002035.s004.pdf]
